# Supplementary material
Source: publisher figshare collection journal article supplement (https://rs.figshare.com/ndownloader/files/9338302)
Supplement: Supplementary file 1 [file 9338302]

## Sheet: Speaker
Ears (Y/N)	species	individual	Frequncy	rawdB	svl	click amplitude	SpeciesNumber
N	aborescandens	A10	1100Hz	85	2.68	0.00375	9
N	aborescandens	A10	1500Hz	83	2.68	0.00375	9
N	aborescandens	A10	1750Hz	95	2.68	0.00375	9
N	aborescandens	A10	2000Hz	90	2.68	0.00375	9
N	aborescandens	A10	2250Hz	94	2.68	0.00375	9
N	aborescandens	A10	2500Hz	95	2.68	0.00375	9
N	aborescandens	A10	3000Hz	99	2.68	0.00375	9
N	aborescandens	A10	300Hz	57	2.68	0.00375	9
N	aborescandens	A10	4000Hz	105	2.68	0.00375	9
N	aborescandens	A10	400Hz	75	2.68	0.00375	9
N	aborescandens	A10	500Hz	77	2.68	0.00375	9
N	aborescandens	A10	700Hz	75	2.68	0.00375	9
N	aborescandens	A10	900Hz	80	2.68	0.00375	9
N	aborescandens	A11	200Hz	65	2.69	0.004	9
N	aborescandens	A11	300Hz	64	2.69	0.004	9
N	aborescandens	A12	200Hz	82	3.62	0.004	9
N	aborescandens	A12	300Hz	65	3.62	0.004	9
N	aborescandens	A13	1100Hz	70	3.4	0.003	9
N	aborescandens	A13	1300Hz	70	3.4	0.003	9
N	aborescandens	A13	1500Hz	79	3.4	0.003	9
N	aborescandens	A13	1750Hz	90	3.4	0.003	9
N	aborescandens	A13	2000Hz	90	3.4	0.003	9
N	aborescandens	A13	2250Hz	100	3.4	0.003	9
N	aborescandens	A13	2500Hz	100	3.4	0.003	9
N	aborescandens	A13	3000Hz	99	3.4	0.003	9
N	aborescandens	A13	300Hz	52	3.4	0.003	9
N	aborescandens	A13	3500Hz	103	3.4	0.003	9
N	aborescandens	A13	4000Hz	105	3.4	0.003	9
N	aborescandens	A13	400Hz	80	3.4	0.003	9
N	aborescandens	A13	500Hz	76	3.4	0.003	9
N	aborescandens	A13	700Hz	75	3.4	0.003	9
N	aborescandens	A13	900Hz	75	3.4	0.003	9
N	aborescandens	A14	1100Hz	70	3.65	0.014	9
N	aborescandens	A14	1300Hz	75	3.65	0.014	9
N	aborescandens	A14	1500Hz	72	3.65	0.014	9
N	aborescandens	A14	1750Hz	70	3.65	0.014	9
N	aborescandens	A14	2000Hz	80	3.65	0.014	9
N	aborescandens	A14	200Hz	62	3.65	0.014	9
N	aborescandens	A14	2250Hz	90	3.65	0.014	9
N	aborescandens	A14	2500Hz	90	3.65	0.014	9
N	aborescandens	A14	3000Hz	88	3.65	0.014	9
N	aborescandens	A14	300Hz	45	3.65	0.014	9
N	aborescandens	A14	400Hz	55	3.65	0.014	9
N	aborescandens	A14	500Hz	51	3.65	0.014	9
N	aborescandens	A14	700Hz	56	3.65	0.014	9
N	aborescandens	A14	900Hz	70	3.65	0.014	9
N	aborescandens	A15	1100Hz	70	3.74	0.005	9
N	aborescandens	A15	1300Hz	65	3.74	0.005	9
N	aborescandens	A15	1500Hz	63	3.74	0.005	9
N	aborescandens	A15	1750Hz	70	3.74	0.005	9
N	aborescandens	A15	2000Hz	75	3.74	0.005	9
N	aborescandens	A15	200Hz	55	3.74	0.005	9
N	aborescandens	A15	2250Hz	84	3.74	0.005	9
N	aborescandens	A15	2500Hz	80	3.74	0.005	9
N	aborescandens	A15	3000Hz	88	3.74	0.005	9
N	aborescandens	A15	300Hz	51	3.74	0.005	9
N	aborescandens	A15	400Hz	55	3.74	0.005	9
N	aborescandens	A15	500Hz	60	3.74	0.005	9
N	aborescandens	A15	700Hz	72	3.74	0.005	9
N	aborescandens	A15	900Hz	65	3.74	0.005	9
N	aborescandens	A3	1100Hz	75	2.75	0.002	9
N	aborescandens	A3	1300Hz	75	2.75	0.002	9
N	aborescandens	A3	1500Hz	80	2.75	0.002	9
N	aborescandens	A3	1750Hz	95	2.75	0.002	9
N	aborescandens	A3	200Hz	86	2.75	0.002	9
N	aborescandens	A3	3000Hz	98	2.75	0.002	9
N	aborescandens	A3	300Hz	49	2.75	0.002	9
N	aborescandens	A3	4000Hz	105	2.75	0.002	9
N	aborescandens	A3	400Hz	55	2.75	0.002	9
N	aborescandens	A3	500Hz	50	2.75	0.002	9
N	aborescandens	A3	700Hz	71	2.75	0.002	9
N	aborescandens	A3	900Hz	75	2.75	0.002	9
N	aborescandens	A4	1100Hz	80	3.1	0.0045	9
N	aborescandens	A4	1500Hz	82	3.1	0.0045	9
N	aborescandens	A4	1750Hz	95	3.1	0.0045	9
N	aborescandens	A4	2000Hz	90	3.1	0.0045	9
N	aborescandens	A4	200Hz	55	3.1	0.0045	9
N	aborescandens	A4	2250Hz	85	3.1	0.0045	9
N	aborescandens	A4	2500Hz	103	3.1	0.0045	9
N	aborescandens	A4	3000Hz	105	3.1	0.0045	9
N	aborescandens	A4	300Hz	59	3.1	0.0045	9
N	aborescandens	A4	3500Hz	95	3.1	0.0045	9
N	aborescandens	A4	400Hz	60	3.1	0.0045	9
N	aborescandens	A4	500Hz	70	3.1	0.0045	9
N	aborescandens	A4	700Hz	70	3.1	0.0045	9
N	aborescandens	A4	900Hz	80	3.1	0.0045	9
N	aborescandens	A8	1100Hz	70	3.22	0.0035	9
N	aborescandens	A8	1300Hz	75	3.22	0.0035	9
N	aborescandens	A8	1500Hz	69	3.22	0.0035	9
N	aborescandens	A8	1750Hz	70	3.22	0.0035	9
N	aborescandens	A8	2000Hz	80	3.22	0.0035	9
N	aborescandens	A8	200Hz	82	3.22	0.0035	9
N	aborescandens	A8	2250Hz	85	3.22	0.0035	9
N	aborescandens	A8	2500Hz	85	3.22	0.0035	9
N	aborescandens	A8	3000Hz	85	3.22	0.0035	9
N	aborescandens	A8	300Hz	60	3.22	0.0035	9
N	aborescandens	A8	400Hz	60	3.22	0.0035	9
N	aborescandens	A8	500Hz	50	3.22	0.0035	9
N	aborescandens	A8	700Hz	65	3.22	0.0035	9
N	aborescandens	A8	900Hz	70	3.22	0.0035	9
N	aborescandens	A9	1100Hz	70	3.03	0.0065	9
N	aborescandens	A9	1300Hz	70	3.03	0.0065	9
N	aborescandens	A9	1500Hz	69	3.03	0.0065	9
N	aborescandens	A9	1750Hz	70	3.03	0.0065	9
N	aborescandens	A9	2000Hz	85	3.03	0.0065	9
N	aborescandens	A9	200Hz	72	3.03	0.0065	9
N	aborescandens	A9	2250Hz	100	3.03	0.0065	9
N	aborescandens	A9	2500Hz	85	3.03	0.0065	9
N	aborescandens	A9	3000Hz	90	3.03	0.0065	9
N	aborescandens	A9	300Hz	40	3.03	0.0065	9
N	aborescandens	A9	3500Hz	96	3.03	0.0065	9
N	aborescandens	A9	4000Hz	95	3.03	0.0065	9
N	aborescandens	A9	400Hz	60	3.03	0.0065	9
N	aborescandens	A9	500Hz	45	3.03	0.0065	9
N	aborescandens	A9	700Hz	55	3.03	0.0065	9
N	aborescandens	A9	900Hz	70	3.03	0.0065	9
N	festae	A3695	1100Hz	85	2.83	0.003	8
N	festae	A3695	1300Hz	80	2.83	0.003	8
N	festae	A3695	1500Hz	70	2.83	0.003	8
N	festae	A3695	1750Hz	75	2.83	0.003	8
N	festae	A3695	2000Hz	85	2.83	0.003	8
N	festae	A3695	200Hz	60	2.83	0.003	8
N	festae	A3695	2250Hz	80	2.83	0.003	8
N	festae	A3695	2500Hz	85	2.83	0.003	8
N	festae	A3695	3000Hz	80	2.83	0.003	8
N	festae	A3695	300Hz	60	2.83	0.003	8
N	festae	A3695	4000Hz	100	2.83	0.003	8
N	festae	A3695	400Hz	70	2.83	0.003	8
N	festae	A3695	500Hz	60	2.83	0.003	8
N	festae	A3695	700Hz	65	2.83	0.003	8
N	festae	A3695	900Hz	70	2.83	0.003	8
N	festae	A3701	1100Hz	80	2.76	0.004	8
N	festae	A3701	1300Hz	80	2.76	0.004	8
N	festae	A3701	1500Hz	75	2.76	0.004	8
N	festae	A3701	1750Hz	80	2.76	0.004	8
N	festae	A3701	2000Hz	85	2.76	0.004	8
N	festae	A3701	200Hz	50	2.76	0.004	8
N	festae	A3701	2250Hz	80	2.76	0.004	8
N	festae	A3701	2500Hz	90	2.76	0.004	8
N	festae	A3701	3000Hz	93	2.76	0.004	8
N	festae	A3701	300Hz	48	2.76	0.004	8
N	festae	A3701	400Hz	60	2.76	0.004	8
N	festae	A3701	500Hz	55	2.76	0.004	8
N	festae	A3701	700Hz	60	2.76	0.004	8
N	festae	A3701	900Hz	75	2.76	0.004	8
N	festae	A3702	1100Hz	85	2.95	0.0065	8
N	festae	A3702	1300Hz	70	2.95	0.0065	8
N	festae	A3702	1500Hz	60	2.95	0.0065	8
N	festae	A3702	1750Hz	70	2.95	0.0065	8
N	festae	A3702	2000Hz	75	2.95	0.0065	8
N	festae	A3702	200Hz	60	2.95	0.0065	8
N	festae	A3702	2250Hz	80	2.95	0.0065	8
N	festae	A3702	2500Hz	85	2.95	0.0065	8
N	festae	A3702	3000Hz	75	2.95	0.0065	8
N	festae	A3702	300Hz	45	2.95	0.0065	8
N	festae	A3702	3500Hz	112	2.95	0.0065	8
N	festae	A3702	4000Hz	105	2.95	0.0065	8
N	festae	A3702	400Hz	60	2.95	0.0065	8
N	festae	A3702	500Hz	50	2.95	0.0065	8
N	festae	A3702	700Hz	55	2.95	0.0065	8
N	festae	A3702	900Hz	70	2.95	0.0065	8
N	guacamayo	A2515	1100Hz	80		0.00775	1
N	guacamayo	A2515	1300Hz	80		0.00775	1
N	guacamayo	A2515	1500Hz	95		0.00775	1
N	guacamayo	A2515	2000Hz	100		0.00775	1
N	guacamayo	A2515	2250Hz	100		0.00775	1
N	guacamayo	A2515	300Hz	45		0.00775	1
N	guacamayo	A2515	4000Hz	100		0.00775	1
N	guacamayo	A2515	400Hz	40		0.00775	1
N	guacamayo	A2515	500Hz	45		0.00775	1
N	guacamayo	A2515	700Hz	40		0.00775	1
N	guacamayo	A2515	900Hz	70		0.00775	1
N	guacamayo	A2516	200Hz	66	2.5	0.00275	1
N	guacamayo	A2516	3000Hz	105	2.5	0.00275	1
N	guacamayo	A2516	300Hz	60	2.5	0.00275	1
N	guacamayo	A2516	400Hz	65	2.5	0.00275	1
N	guacamayo	A2516	500Hz	60	2.5	0.00275	1
N	guacamayo	A2516	700Hz	75	2.5	0.00275	1
N	guacamayo	A2516	900Hz	95	2.5	0.00275	1
N	guacamayo	A2517	1100Hz	75	2.4	0.00275	1
N	guacamayo	A2517	1300Hz	80	2.4	0.00275	1
N	guacamayo	A2517	200Hz	40	2.4	0.00275	1
N	guacamayo	A2517	2500Hz	95	2.4	0.00275	1
N	guacamayo	A2517	3000Hz	100	2.4	0.00275	1
N	guacamayo	A2517	300Hz	45	2.4	0.00275	1
N	guacamayo	A2517	400Hz	75	2.4	0.00275	1
N	guacamayo	A2517	500Hz	75	2.4	0.00275	1
N	guacamayo	A2517	700Hz	45	2.4	0.00275	1
N	guacamayo	A2517	900Hz	60	2.4	0.00275	1
N	guacamayo	A2519	200Hz	72	2.64	0.0045	1
N	guacamayo	A2519	300Hz	55	2.64	0.0045	1
N	guacamayo	A2520	1100Hz	85	3.02	0.00375	1
N	guacamayo	A2520	1300Hz	90	3.02	0.00375	1
N	guacamayo	A2520	1500Hz	90	3.02	0.00375	1
N	guacamayo	A2520	1750Hz	90	3.02	0.00375	1
N	guacamayo	A2520	2000Hz	90	3.02	0.00375	1
N	guacamayo	A2520	200Hz	44	3.02	0.00375	1
N	guacamayo	A2520	2250Hz	100	3.02	0.00375	1
N	guacamayo	A2520	300Hz	65	3.02	0.00375	1
N	guacamayo	A2520	400Hz	70	3.02	0.00375	1
N	guacamayo	A2520	500Hz	65	3.02	0.00375	1
N	guacamayo	A2520	900Hz	65	3.02	0.00375	1
N	guacamayo	A2521	1100Hz	85	3.12		1
N	guacamayo	A2521	1500Hz	95	3.12		1
N	guacamayo	A2521	1750Hz	95	3.12		1
N	guacamayo	A2521	200Hz	65	3.12		1
N	guacamayo	A2521	300Hz	55	3.12		1
N	guacamayo	A2521	400Hz	60	3.12		1
N	guacamayo	A2521	500Hz	65	3.12		1
N	guacamayo	A2521	700Hz	70	3.12		1
N	guacamayo	A2521	900Hz	80	3.12		1
N	guacamayo	A2522	2000Hz	90	3.05		1
N	guacamayo	A2522	200Hz	63	3.05		1
N	guacamayo	A2522	2500Hz	100	3.05		1
N	guacamayo	A2522	300Hz	50	3.05		1
N	guacamayo	A2522	3500Hz	100	3.05		1
N	guacamayo	A2522	400Hz	70	3.05		1
N	guacamayo	A2522	500Hz	60	3.05		1
N	guacamayo	A2522	700Hz	60	3.05		1
N	guacamayo	A2523	1300Hz	95	3.06	0.003	1
N	guacamayo	A2523	1500Hz	95	3.06	0.003	1
N	guacamayo	A2523	2000Hz	90	3.06	0.003	1
N	guacamayo	A2523	200Hz	50	3.06	0.003	1
N	guacamayo	A2523	2250Hz	95	3.06	0.003	1
N	guacamayo	A2523	2500Hz	100	3.06	0.003	1
N	guacamayo	A2523	3000Hz	90	3.06	0.003	1
N	guacamayo	A2523	300Hz	55	3.06	0.003	1
N	guacamayo	A2523	3500Hz	100	3.06	0.003	1
N	guacamayo	A2523	400Hz	70	3.06	0.003	1
N	guacamayo	A2523	500Hz	60	3.06	0.003	1
N	guacamayo	A2523	700Hz	65	3.06	0.003	1
N	guacamayo	A2523	900Hz	75	3.06	0.003	1
Y	haematiticus	A4334	1100Hz	60	7.31	0.013	2
Y	haematiticus	A4334	1300Hz	60	7.31	0.013	2
Y	haematiticus	A4334	1500Hz	60	7.31	0.013	2
Y	haematiticus	A4334	1750Hz	60	7.31	0.013	2
Y	haematiticus	A4334	2000Hz	55	7.31	0.013	2
Y	haematiticus	A4334	200Hz	65	7.31	0.013	2
Y	haematiticus	A4334	2250Hz	55	7.31	0.013	2
Y	haematiticus	A4334	2500Hz	50	7.31	0.013	2
Y	haematiticus	A4334	3000Hz	55	7.31	0.013	2
Y	haematiticus	A4334	300Hz	64	7.31	0.013	2
Y	haematiticus	A4334	3500Hz	75	7.31	0.013	2
Y	haematiticus	A4334	4000Hz	90	7.31	0.013	2
Y	haematiticus	A4334	400Hz	65	7.31	0.013	2
Y	haematiticus	A4334	500Hz	65	7.31	0.013	2
Y	haematiticus	A4334	700Hz	65	7.31	0.013	2
Y	haematiticus	A4334	900Hz	55	7.31	0.013	2
Y	haematiticus	A4336	1100Hz	50	7.53	0.084	2
Y	haematiticus	A4336	1300Hz	50	7.53	0.084	2
Y	haematiticus	A4336	1500Hz	40	7.53	0.084	2
Y	haematiticus	A4336	1750Hz	45	7.53	0.084	2
Y	haematiticus	A4336	2000Hz	50	7.53	0.084	2
Y	haematiticus	A4336	200Hz	50	7.53	0.084	2
Y	haematiticus	A4336	2250Hz	40	7.53	0.084	2
Y	haematiticus	A4336	2500Hz	45	7.53	0.084	2
Y	haematiticus	A4336	3000Hz	55	7.53	0.084	2
Y	haematiticus	A4336	300Hz	39	7.53	0.084	2
Y	haematiticus	A4336	3500Hz	65	7.53	0.084	2
Y	haematiticus	A4336	4000Hz	70	7.53	0.084	2
Y	haematiticus	A4336	400Hz	45	7.53	0.084	2
Y	haematiticus	A4336	500Hz	40	7.53	0.084	2
Y	haematiticus	A4336	700Hz	48	7.53	0.084	2
Y	haematiticus	A4336	900Hz	50	7.53	0.084	2
Y	haematiticus	A4337	1100Hz	55	7.4	0.0305	2
Y	haematiticus	A4337	1300Hz	50	7.4	0.0305	2
Y	haematiticus	A4337	1500Hz	45	7.4	0.0305	2
Y	haematiticus	A4337	1750Hz	45	7.4	0.0305	2
Y	haematiticus	A4337	2000Hz	40	7.4	0.0305	2
Y	haematiticus	A4337	200Hz	60	7.4	0.0305	2
Y	haematiticus	A4337	2250Hz	45	7.4	0.0305	2
Y	haematiticus	A4337	2500Hz	50	7.4	0.0305	2
Y	haematiticus	A4337	3000Hz	65	7.4	0.0305	2
Y	haematiticus	A4337	300Hz	54	7.4	0.0305	2
Y	haematiticus	A4337	3500Hz	75	7.4	0.0305	2
Y	haematiticus	A4337	4000Hz	90	7.4	0.0305	2
Y	haematiticus	A4337	400Hz	55	7.4	0.0305	2
Y	haematiticus	A4337	500Hz	55	7.4	0.0305	2
Y	haematiticus	A4337	700Hz	55	7.4	0.0305	2
Y	haematiticus	A4337	900Hz	55	7.4	0.0305	2
Y	haematiticus	A4339	1100Hz	60	7.34	0.0185	2
Y	haematiticus	A4339	1300Hz	55	7.34	0.0185	2
Y	haematiticus	A4339	1500Hz	50	7.34	0.0185	2
Y	haematiticus	A4339	1750Hz	50	7.34	0.0185	2
Y	haematiticus	A4339	2000Hz	45	7.34	0.0185	2
Y	haematiticus	A4339	200Hz	65	7.34	0.0185	2
Y	haematiticus	A4339	2250Hz	45	7.34	0.0185	2
Y	haematiticus	A4339	2500Hz	45	7.34	0.0185	2
Y	haematiticus	A4339	3000Hz	55	7.34	0.0185	2
Y	haematiticus	A4339	300Hz	60	7.34	0.0185	2
Y	haematiticus	A4339	3500Hz	70	7.34	0.0185	2
Y	haematiticus	A4339	4000Hz	74	7.34	0.0185	2
Y	haematiticus	A4339	400Hz	60	7.34	0.0185	2
Y	haematiticus	A4339	500Hz	60	7.34	0.0185	2
Y	haematiticus	A4339	700Hz	60	7.34	0.0185	2
Y	haematiticus	A4339	900Hz	55	7.34	0.0185	2
Y	haematiticus	A674	1100Hz	60	6.96	0.01075	2
Y	haematiticus	A674	1300Hz	55	6.96	0.01075	2
Y	haematiticus	A674	1500Hz	55	6.96	0.01075	2
Y	haematiticus	A674	1750Hz	60	6.96	0.01075	2
Y	haematiticus	A674	2000Hz	65	6.96	0.01075	2
Y	haematiticus	A674	200Hz	58	6.96	0.01075	2
Y	haematiticus	A674	2250Hz	75	6.96	0.01075	2
Y	haematiticus	A674	2500Hz	75	6.96	0.01075	2
Y	haematiticus	A674	3000Hz	70	6.96	0.01075	2
Y	haematiticus	A674	300Hz	50	6.96	0.01075	2
Y	haematiticus	A674	3500Hz	80	6.96	0.01075	2
Y	haematiticus	A674	4000Hz	75	6.96	0.01075	2
Y	haematiticus	A674	400Hz	55	6.96	0.01075	2
Y	haematiticus	A674	500Hz	50	6.96	0.01075	2
Y	haematiticus	A674	700Hz	40	6.96	0.01075	2
Y	haematiticus	A674	900Hz	55	6.96	0.01075	2
Y	leptoscelis	A100	1100Hz	70	3.5	0.035	5
Y	leptoscelis	A100	1300Hz	60	3.5	0.035	5
Y	leptoscelis	A100	1500Hz	54	3.5	0.035	5
Y	leptoscelis	A100	1750Hz	55	3.5	0.035	5
Y	leptoscelis	A100	2000Hz	55	3.5	0.035	5
Y	leptoscelis	A100	200Hz	45	3.5	0.035	5
Y	leptoscelis	A100	2250Hz	66	3.5	0.035	5
Y	leptoscelis	A100	2500Hz	60	3.5	0.035	5
Y	leptoscelis	A100	3000Hz	63	3.5	0.035	5
Y	leptoscelis	A100	300Hz	45	3.5	0.035	5
Y	leptoscelis	A100	3500Hz	88	3.5	0.035	5
Y	leptoscelis	A100	4000Hz	90	3.5	0.035	5
Y	leptoscelis	A100	400Hz	40	3.5	0.035	5
Y	leptoscelis	A100	500Hz	35	3.5	0.035	5
Y	leptoscelis	A100	700Hz	35	3.5	0.035	5
Y	leptoscelis	A100	900Hz	55	3.5	0.035	5
Y	leptoscelis	A23	1100Hz	60	4.24	0.043	5
Y	leptoscelis	A23	1300Hz	45	4.24	0.043	5
Y	leptoscelis	A23	1500Hz	46	4.24	0.043	5
Y	leptoscelis	A23	1750Hz	45	4.24	0.043	5
Y	leptoscelis	A23	2000Hz	55	4.24	0.043	5
Y	leptoscelis	A23	200Hz	50	4.24	0.043	5
Y	leptoscelis	A23	2250Hz	55	4.24	0.043	5
Y	leptoscelis	A23	2500Hz	60	4.24	0.043	5
Y	leptoscelis	A23	3000Hz	70	4.24	0.043	5
Y	leptoscelis	A23	300Hz	37	4.24	0.043	5
Y	leptoscelis	A23	3500Hz	91	4.24	0.043	5
Y	leptoscelis	A23	4000Hz	100	4.24	0.043	5
Y	leptoscelis	A23	400Hz	45	4.24	0.043	5
Y	leptoscelis	A23	500Hz	50	4.24	0.043	5
Y	leptoscelis	A23	700Hz	55	4.24	0.043	5
Y	leptoscelis	A23	900Hz	65	4.24	0.043	5
Y	leptoscelis	A24	1100Hz	60	4	0.026	5
Y	leptoscelis	A24	1300Hz	50	4	0.026	5
Y	leptoscelis	A24	1500Hz	57	4	0.026	5
Y	leptoscelis	A24	1750Hz	55	4	0.026	5
Y	leptoscelis	A24	2000Hz	55	4	0.026	5
Y	leptoscelis	A24	200Hz	50	4	0.026	5
Y	leptoscelis	A24	2250Hz	60	4	0.026	5
Y	leptoscelis	A24	2500Hz	60	4	0.026	5
Y	leptoscelis	A24	3000Hz	65	4	0.026	5
Y	leptoscelis	A24	300Hz	45	4	0.026	5
Y	leptoscelis	A24	3500Hz	87	4	0.026	5
Y	leptoscelis	A24	4000Hz	90	4	0.026	5
Y	leptoscelis	A24	400Hz	40	4	0.026	5
Y	leptoscelis	A24	500Hz	50	4	0.026	5
Y	leptoscelis	A24	700Hz	55	4	0.026	5
Y	leptoscelis	A24	900Hz	55	4	0.026	5
Y	margaritifer	A1731	1100Hz	70	3.68	0.0145	6
Y	margaritifer	A1731	1300Hz	60	3.68	0.0145	6
Y	margaritifer	A1731	1500Hz	60	3.68	0.0145	6
Y	margaritifer	A1731	1750Hz	60	3.68	0.0145	6
Y	margaritifer	A1731	2000Hz	55	3.68	0.0145	6
Y	margaritifer	A1731	2250Hz	65	3.68	0.0145	6
Y	margaritifer	A1731	2500Hz	60	3.68	0.0145	6
Y	margaritifer	A1731	3000Hz	85	3.68	0.0145	6
Y	margaritifer	A1731	300Hz	65	3.68	0.0145	6
Y	margaritifer	A1731	3500Hz	95	3.68	0.0145	6
Y	margaritifer	A1731	4000Hz	80	3.68	0.0145	6
Y	margaritifer	A1731	400Hz	70	3.68	0.0145	6
Y	margaritifer	A1731	500Hz	60	3.68	0.0145	6
Y	margaritifer	A1731	700Hz	65	3.68	0.0145	6
Y	margaritifer	A1731	900Hz	75	3.68	0.0145	6
Y	margaritifer	A1732	1100Hz	50	3.64	0.0215	6
Y	margaritifer	A1732	1300Hz	45	3.64	0.0215	6
Y	margaritifer	A1732	1500Hz	50	3.64	0.0215	6
Y	margaritifer	A1732	1750Hz	50	3.64	0.0215	6
Y	margaritifer	A1732	2000Hz	50	3.64	0.0215	6
Y	margaritifer	A1732	200Hz	65	3.64	0.0215	6
Y	margaritifer	A1732	2250Hz	60	3.64	0.0215	6
Y	margaritifer	A1732	2500Hz	55	3.64	0.0215	6
Y	margaritifer	A1732	3000Hz	60	3.64	0.0215	6
Y	margaritifer	A1732	300Hz	60	3.64	0.0215	6
Y	margaritifer	A1732	3500Hz	70	3.64	0.0215	6
Y	margaritifer	A1732	4000Hz	85	3.64	0.0215	6
Y	margaritifer	A1732	400Hz	65	3.64	0.0215	6
Y	margaritifer	A1732	500Hz	60	3.64	0.0215	6
Y	margaritifer	A1732	700Hz	55	3.64	0.0215	6
Y	margaritifer	A1732	900Hz	50	3.64	0.0215	6
Y	margaritifer	A1735	1100Hz	65	3.5	0.0335	6
Y	margaritifer	A1735	1300Hz	60	3.5	0.0335	6
Y	margaritifer	A1735	1500Hz	60	3.5	0.0335	6
Y	margaritifer	A1735	1750Hz	65	3.5	0.0335	6
Y	margaritifer	A1735	300Hz	75	3.5	0.0335	6
Y	margaritifer	A1735	400Hz	65	3.5	0.0335	6
Y	margaritifer	A1735	500Hz	70	3.5	0.0335	6
Y	margaritifer	A1735	700Hz	75	3.5	0.0335	6
Y	margaritifer	A1735	900Hz	70	3.5	0.0335	6
Y	margaritifer	A1736	1100Hz	60	3.46	0.02	6
Y	margaritifer	A1736	1300Hz	55	3.46	0.02	6
Y	margaritifer	A1736	1500Hz	60	3.46	0.02	6
Y	margaritifer	A1736	1750Hz	65	3.46	0.02	6
Y	margaritifer	A1736	2000Hz	70	3.46	0.02	6
Y	margaritifer	A1736	200Hz	60	3.46	0.02	6
Y	margaritifer	A1736	2250Hz	75	3.46	0.02	6
Y	margaritifer	A1736	2500Hz	80	3.46	0.02	6
Y	margaritifer	A1736	3000Hz	85	3.46	0.02	6
Y	margaritifer	A1736	300Hz	70	3.46	0.02	6
Y	margaritifer	A1736	3500Hz	85	3.46	0.02	6
Y	margaritifer	A1736	4000Hz	95	3.46	0.02	6
Y	margaritifer	A1736	400Hz	65	3.46	0.02	6
Y	margaritifer	A1736	500Hz	60	3.46	0.02	6
Y	margaritifer	A1736	700Hz	65	3.46	0.02	6
Y	margaritifer	A1736	900Hz	65	3.46	0.02	6
Y	margaritifer	A4349	1100Hz	50	3.9	0.00875	6
Y	margaritifer	A4349	1300Hz	50	3.9	0.00875	6
Y	margaritifer	A4349	1500Hz	50	3.9	0.00875	6
Y	margaritifer	A4349	1750Hz	55	3.9	0.00875	6
Y	margaritifer	A4349	2000Hz	65	3.9	0.00875	6
Y	margaritifer	A4349	200Hz	57	3.9	0.00875	6
Y	margaritifer	A4349	2250Hz	75	3.9	0.00875	6
Y	margaritifer	A4349	2500Hz	75	3.9	0.00875	6
Y	margaritifer	A4349	3000Hz	75	3.9	0.00875	6
Y	margaritifer	A4349	300Hz	65	3.9	0.00875	6
Y	margaritifer	A4349	3500Hz	95	3.9	0.00875	6
Y	margaritifer	A4349	4000Hz	95	3.9	0.00875	6
Y	margaritifer	A4349	400Hz	60	3.9	0.00875	6
Y	margaritifer	A4349	500Hz	55	3.9	0.00875	6
Y	margaritifer	A4349	700Hz	50	3.9	0.00875	6
Y	margaritifer	A4349	900Hz	80	3.9	0.00875	6
Y	margaritifer	A4353	1100Hz	45	3.85		6
Y	margaritifer	A4353	1300Hz	45	3.85		6
Y	margaritifer	A4353	1500Hz	42	3.85		6
Y	margaritifer	A4353	1750Hz	45	3.85		6
Y	margaritifer	A4353	2000Hz	45	3.85		6
Y	margaritifer	A4353	200Hz	60	3.85		6
Y	margaritifer	A4353	2250Hz	50	3.85		6
Y	margaritifer	A4353	2500Hz	55	3.85		6
Y	margaritifer	A4353	3000Hz	70	3.85		6
Y	margaritifer	A4353	300Hz	50	3.85		6
Y	margaritifer	A4353	3500Hz	81	3.85		6
Y	margaritifer	A4353	4000Hz	85	3.85		6
Y	margaritifer	A4353	400Hz	65	3.85		6
Y	margaritifer	A4353	500Hz	55	3.85		6
Y	margaritifer	A4353	700Hz	51	3.85		6
Y	margaritifer	A4353	900Hz	50	3.85		6
Y	margaritifer	A4359	1100Hz	55	4.11	0.0325	6
Y	margaritifer	A4359	1300Hz	50	4.11	0.0325	6
Y	margaritifer	A4359	1500Hz	43	4.11	0.0325	6
Y	margaritifer	A4359	1750Hz	45	4.11	0.0325	6
Y	margaritifer	A4359	2000Hz	45	4.11	0.0325	6
Y	margaritifer	A4359	200Hz	60	4.11	0.0325	6
Y	margaritifer	A4359	2250Hz	50	4.11	0.0325	6
Y	margaritifer	A4359	2500Hz	50	4.11	0.0325	6
Y	margaritifer	A4359	3000Hz	60	4.11	0.0325	6
Y	margaritifer	A4359	300Hz	60	4.11	0.0325	6
Y	margaritifer	A4359	3500Hz	65	4.11	0.0325	6
Y	margaritifer	A4359	4000Hz	75	4.11	0.0325	6
Y	margaritifer	A4359	400Hz	60	4.11	0.0325	6
Y	margaritifer	A4359	500Hz	60	4.11	0.0325	6
Y	margaritifer	A4359	700Hz	56	4.11	0.0325	6
Y	margaritifer	A4359	900Hz	50	4.11	0.0325	6
Y	margaritifer	A4360	1100Hz	60	4	0.035	6
Y	margaritifer	A4360	1300Hz	55	4	0.035	6
Y	margaritifer	A4360	1500Hz	52	4	0.035	6
Y	margaritifer	A4360	1750Hz	55	4	0.035	6
Y	margaritifer	A4360	2000Hz	50	4	0.035	6
Y	margaritifer	A4360	200Hz	70	4	0.035	6
Y	margaritifer	A4360	2250Hz	50	4	0.035	6
Y	margaritifer	A4360	2500Hz	60	4	0.035	6
Y	margaritifer	A4360	3000Hz	70	4	0.035	6
Y	margaritifer	A4360	300Hz	60	4	0.035	6
Y	margaritifer	A4360	3500Hz	80	4	0.035	6
Y	margaritifer	A4360	4000Hz	90	4	0.035	6
Y	margaritifer	A4360	400Hz	65	4	0.035	6
Y	margaritifer	A4360	500Hz	60	4	0.035	6
Y	margaritifer	A4360	700Hz	56	4	0.035	6
Y	margaritifer	A4360	900Hz	55	4	0.035	6
Y	margaritifer	A976	1100Hz	60	5.95	0.0085	6
Y	margaritifer	A976	1300Hz	45	5.95	0.0085	6
Y	margaritifer	A976	1500Hz	41	5.95	0.0085	6
Y	margaritifer	A976	1750Hz	45	5.95	0.0085	6
Y	margaritifer	A976	2000Hz	45	5.95	0.0085	6
Y	margaritifer	A976	200Hz	50	5.95	0.0085	6
Y	margaritifer	A976	2250Hz	50	5.95	0.0085	6
Y	margaritifer	A976	2500Hz	65	5.95	0.0085	6
Y	margaritifer	A976	3000Hz	75	5.95	0.0085	6
Y	margaritifer	A976	300Hz	49	5.95	0.0085	6
Y	margaritifer	A976	3500Hz	81	5.95	0.0085	6
Y	margaritifer	A976	4000Hz	85	5.95	0.0085	6
Y	margaritifer	A976	400Hz	50	5.95	0.0085	6
Y	margaritifer	A976	500Hz	60	5.95	0.0085	6
Y	margaritifer	A976	700Hz	52	5.95	0.0085	6
Y	margaritifer	A976	900Hz	55	5.95	0.0085	6
Y	marinus	A1705	1100Hz	45	11.07	0.012	3
Y	marinus	A1705	1300Hz	45	11.07	0.012	3
Y	marinus	A1705	1500Hz	50	11.07	0.012	3
Y	marinus	A1705	1750Hz	60	11.07	0.012	3
Y	marinus	A1705	2000Hz	60	11.07	0.012	3
Y	marinus	A1705	200Hz	58	11.07	0.012	3
Y	marinus	A1705	2250Hz	60	11.07	0.012	3
Y	marinus	A1705	2500Hz	70	11.07	0.012	3
Y	marinus	A1705	300Hz	70	11.07	0.012	3
Y	marinus	A1705	400Hz	60	11.07	0.012	3
Y	marinus	A1705	500Hz	50	11.07	0.012	3
Y	marinus	A1705	700Hz	45	11.07	0.012	3
Y	marinus	A1705	900Hz	40	11.07	0.012	3
Y	marinus	A4332	1100Hz	30	10.7	0.0185	3
Y	marinus	A4332	1300Hz	40	10.7	0.0185	3
Y	marinus	A4332	1500Hz	45	10.7	0.0185	3
Y	marinus	A4332	1750Hz	50	10.7	0.0185	3
Y	marinus	A4332	2000Hz	55	10.7	0.0185	3
Y	marinus	A4332	2250Hz	60	10.7	0.0185	3
Y	marinus	A4332	2500Hz	65	10.7	0.0185	3
Y	marinus	A4332	3000Hz	89	10.7	0.0185	3
Y	marinus	A4332	300Hz	65	10.7	0.0185	3
Y	marinus	A4332	400Hz	65	10.7	0.0185	3
Y	marinus	A4332	500Hz	55	10.7	0.0185	3
Y	marinus	A4332	700Hz	44	10.7	0.0185	3
Y	marinus	A4332	900Hz	30	10.7	0.0185	3
Y	marinus	A4343	1100Hz	45	7.71	0.05325	3
Y	marinus	A4343	1300Hz	40	7.71	0.05325	3
Y	marinus	A4343	1500Hz	32	7.71	0.05325	3
Y	marinus	A4343	1750Hz	40	7.71	0.05325	3
Y	marinus	A4343	2000Hz	50	7.71	0.05325	3
Y	marinus	A4343	200Hz	45	7.71	0.05325	3
Y	marinus	A4343	2250Hz	55	7.71	0.05325	3
Y	marinus	A4343	2500Hz	60	7.71	0.05325	3
Y	marinus	A4343	3000Hz	70	7.71	0.05325	3
Y	marinus	A4343	300Hz	43	7.71	0.05325	3
Y	marinus	A4343	3500Hz	90	7.71	0.05325	3
Y	marinus	A4343	4000Hz	95	7.71	0.05325	3
Y	marinus	A4343	400Hz	45	7.71	0.05325	3
Y	marinus	A4343	500Hz	40	7.71	0.05325	3
Y	marinus	A4343	700Hz	43	7.71	0.05325	3
Y	marinus	A4343	900Hz	35	7.71	0.05325	3
Y	marinus	A4345	1100Hz	35	10	0.0555	3
Y	marinus	A4345	1300Hz	35	10	0.0555	3
Y	marinus	A4345	1500Hz	40	10	0.0555	3
Y	marinus	A4345	1750Hz	50	10	0.0555	3
Y	marinus	A4345	2000Hz	55	10	0.0555	3
Y	marinus	A4345	200Hz	50	10	0.0555	3
Y	marinus	A4345	2250Hz	60	10	0.0555	3
Y	marinus	A4345	2500Hz	65	10	0.0555	3
Y	marinus	A4345	3000Hz	85	10	0.0555	3
Y	marinus	A4345	300Hz	39	10	0.0555	3
Y	marinus	A4345	3500Hz	95	10	0.0555	3
Y	marinus	A4345	4000Hz	105	10	0.0555	3
Y	marinus	A4345	400Hz	45	10	0.0555	3
Y	marinus	A4345	500Hz	45	10	0.0555	3
Y	marinus	A4345	700Hz	36	10	0.0555	3
Y	marinus	A4345	900Hz	40	10	0.0555	3
Y	marinus	A4346	1100Hz	40	8.05	0.031	3
Y	marinus	A4346	1300Hz	40	8.05	0.031	3
Y	marinus	A4346	1500Hz	30	8.05	0.031	3
Y	marinus	A4346	1750Hz	45	8.05	0.031	3
Y	marinus	A4346	2000Hz	50	8.05	0.031	3
Y	marinus	A4346	200Hz	50	8.05	0.031	3
Y	marinus	A4346	2250Hz	50	8.05	0.031	3
Y	marinus	A4346	2500Hz	55	8.05	0.031	3
Y	marinus	A4346	3000Hz	70	8.05	0.031	3
Y	marinus	A4346	300Hz	55	8.05	0.031	3
Y	marinus	A4346	3500Hz	80	8.05	0.031	3
Y	marinus	A4346	4000Hz	90	8.05	0.031	3
Y	marinus	A4346	400Hz	55	8.05	0.031	3
Y	marinus	A4346	500Hz	50	8.05	0.031	3
Y	marinus	A4346	700Hz	48	8.05	0.031	3
Y	marinus	A4346	900Hz	40	8.05	0.031	3
Y	spinulosus	A38	1100Hz	50	6.5	0.0125	4
Y	spinulosus	A38	1300Hz	45	6.5	0.0125	4
Y	spinulosus	A38	1500Hz	50	6.5	0.0125	4
Y	spinulosus	A38	1750Hz	60	6.5	0.0125	4
Y	spinulosus	A38	2000Hz	65	6.5	0.0125	4
Y	spinulosus	A38	200Hz	50	6.5	0.0125	4
Y	spinulosus	A38	2250Hz	65	6.5	0.0125	4
Y	spinulosus	A38	2500Hz	70	6.5	0.0125	4
Y	spinulosus	A38	3000Hz	97	6.5	0.0125	4
Y	spinulosus	A38	300Hz	32	6.5	0.0125	4
Y	spinulosus	A38	4000Hz	110	6.5	0.0125	4
Y	spinulosus	A38	400Hz	40	6.5	0.0125	4
Y	spinulosus	A38	500Hz	40	6.5	0.0125	4
Y	spinulosus	A38	700Hz	40	6.5	0.0125	4
Y	spinulosus	A38	900Hz	55	6.5	0.0125	4
Y	spinulosus	A75	1100Hz	55	6.94	0.006	4
Y	spinulosus	A75	1300Hz	55	6.94	0.006	4
Y	spinulosus	A75	1500Hz	47	6.94	0.006	4
Y	spinulosus	A75	1750Hz	65	6.94	0.006	4
Y	spinulosus	A75	2000Hz	65	6.94	0.006	4
Y	spinulosus	A75	200Hz	60	6.94	0.006	4
Y	spinulosus	A75	2250Hz	70	6.94	0.006	4
Y	spinulosus	A75	2500Hz	70	6.94	0.006	4
Y	spinulosus	A75	3000Hz	85	6.94	0.006	4
Y	spinulosus	A75	300Hz	59	6.94	0.006	4
Y	spinulosus	A75	400Hz	60	6.94	0.006	4
Y	spinulosus	A75	500Hz	50	6.94	0.006	4
Y	spinulosus	A75	700Hz	50	6.94	0.006	4
Y	spinulosus	A75	900Hz	55	6.94	0.006	4
Y	spinulosus	A76	1100Hz	40	7.76	0.00825	4
Y	spinulosus	A76	1300Hz	40	7.76	0.00825	4
Y	spinulosus	A76	1500Hz	35	7.76	0.00825	4
Y	spinulosus	A76	1750Hz	55	7.76	0.00825	4
Y	spinulosus	A76	2000Hz	60	7.76	0.00825	4
Y	spinulosus	A76	200Hz	75	7.76	0.00825	4
Y	spinulosus	A76	2250Hz	65	7.76	0.00825	4
Y	spinulosus	A76	2500Hz	65	7.76	0.00825	4
Y	spinulosus	A76	3000Hz	95	7.76	0.00825	4
Y	spinulosus	A76	300Hz	48	7.76	0.00825	4
Y	spinulosus	A76	400Hz	55	7.76	0.00825	4
Y	spinulosus	A76	500Hz	40	7.76	0.00825	4
Y	spinulosus	A76	700Hz	45	7.76	0.00825	4
Y	spinulosus	A76	900Hz	40	7.76	0.00825	4
Y	spinulosus	A77	1100Hz	65	7.24	0.0055	4
Y	spinulosus	A77	1300Hz	60	7.24	0.0055	4
Y	spinulosus	A77	1500Hz	65	7.24	0.0055	4
Y	spinulosus	A77	1750Hz	75	7.24	0.0055	4
Y	spinulosus	A77	2000Hz	80	7.24	0.0055	4
Y	spinulosus	A77	200Hz	60	7.24	0.0055	4
Y	spinulosus	A77	2250Hz	85	7.24	0.0055	4
Y	spinulosus	A77	2500Hz	85	7.24	0.0055	4
Y	spinulosus	A77	300Hz	38	7.24	0.0055	4
Y	spinulosus	A77	400Hz	50	7.24	0.0055	4
Y	spinulosus	A77	500Hz	45	7.24	0.0055	4
Y	spinulosus	A77	700Hz	55	7.24	0.0055	4
Y	spinulosus	A77	900Hz	60	7.24	0.0055	4
Y	spinulosus	A79	1100Hz	55	6.81	0.00575	4
Y	spinulosus	A79	1300Hz	55	6.81	0.00575	4
Y	spinulosus	A79	1500Hz	40	6.81	0.00575	4
Y	spinulosus	A79	1750Hz	60	6.81	0.00575	4
Y	spinulosus	A79	2000Hz	66	6.81	0.00575	4
Y	spinulosus	A79	200Hz	60	6.81	0.00575	4
Y	spinulosus	A79	2250Hz	70	6.81	0.00575	4
Y	spinulosus	A79	2500Hz	75	6.81	0.00575	4
Y	spinulosus	A79	3000Hz	90	6.81	0.00575	4
Y	spinulosus	A79	300Hz	58	6.81	0.00575	4
Y	spinulosus	A79	400Hz	55	6.81	0.00575	4
Y	spinulosus	A79	500Hz	54	6.81	0.00575	4
Y	spinulosus	A79	700Hz	45	6.81	0.00575	4
Y	spinulosus	A79	900Hz	60	6.81	0.00575	4
Y	tacana	A42	1100Hz	75	3.04	0.0065	10
Y	tacana	A42	1300Hz	80	3.04	0.0065	10
Y	tacana	A42	1500Hz	81	3.04	0.0065	10
Y	tacana	A42	1750Hz	85	3.04	0.0065	10
Y	tacana	A42	2000Hz	80	3.04	0.0065	10
Y	tacana	A42	200Hz	60	3.04	0.0065	10
Y	tacana	A42	2250Hz	75	3.04	0.0065	10
Y	tacana	A42	2500Hz	80	3.04	0.0065	10
Y	tacana	A42	3000Hz	64	3.04	0.0065	10
Y	tacana	A42	300Hz	52	3.04	0.0065	10
Y	tacana	A42	3500Hz	70	3.04	0.0065	10
Y	tacana	A42	4000Hz	80	3.04	0.0065	10
Y	tacana	A42	400Hz	50	3.04	0.0065	10
Y	tacana	A42	500Hz	50	3.04	0.0065	10
Y	tacana	A42	700Hz	55	3.04	0.0065	10
Y	tacana	A42	900Hz	70	3.04	0.0065	10
Y	tacana	A45	1100Hz	75	2.84	0.00575	10
Y	tacana	A45	1300Hz	80	2.84	0.00575	10
Y	tacana	A45	1500Hz	75	2.84	0.00575	10
Y	tacana	A45	1750Hz	80	2.84	0.00575	10
Y	tacana	A45	2000Hz	80	2.84	0.00575	10
Y	tacana	A45	200Hz	60	2.84	0.00575	10
Y	tacana	A45	2250Hz	80	2.84	0.00575	10
Y	tacana	A45	2500Hz	80	2.84	0.00575	10
Y	tacana	A45	3000Hz	76	2.84	0.00575	10
Y	tacana	A45	300Hz	54	2.84	0.00575	10
Y	tacana	A45	3500Hz	95	2.84	0.00575	10
Y	tacana	A45	4000Hz	105	2.84	0.00575	10
Y	tacana	A45	400Hz	60	2.84	0.00575	10
Y	tacana	A45	500Hz	55	2.84	0.00575	10
Y	tacana	A45	700Hz	60	2.84	0.00575	10
Y	tacana	A45	900Hz	70	2.84	0.00575	10
Y	tacana	A46	1100Hz	75	2.34	0.00425	10
Y	tacana	A46	1300Hz	80	2.34	0.00425	10
Y	tacana	A46	200Hz	60	2.34	0.00425	10
Y	tacana	A46	300Hz	54	2.34	0.00425	10
Y	tacana	A46	400Hz	60	2.34	0.00425	10
Y	tacana	A46	500Hz	55	2.34	0.00425	10
Y	tacana	A46	700Hz	60	2.34	0.00425	10
Y	tacana	A46	900Hz	70	2.34	0.00425	10
N	yunga	A28	1100Hz	62	3.81	0.0185	7
N	yunga	A28	1300Hz	50	3.81	0.0185	7
N	yunga	A28	1500Hz	48	3.81	0.0185	7
N	yunga	A28	1750Hz	60	3.81	0.0185	7
N	yunga	A28	2000Hz	65	3.81	0.0185	7
N	yunga	A28	200Hz	55	3.81	0.0185	7
N	yunga	A28	2250Hz	70	3.81	0.0185	7
N	yunga	A28	2500Hz	75	3.81	0.0185	7
N	yunga	A28	3000Hz	85	3.81	0.0185	7
N	yunga	A28	300Hz	43	3.81	0.0185	7
N	yunga	A28	4000Hz	100	3.81	0.0185	7
N	yunga	A28	400Hz	50	3.81	0.0185	7
N	yunga	A28	500Hz	50	3.81	0.0185	7
N	yunga	A28	700Hz	50	3.81	0.0185	7
N	yunga	A28	900Hz	45	3.81	0.0185	7
N	yunga	A49	1100Hz	45	4.35	0.01175	7
N	yunga	A49	1300Hz	45	4.35	0.01175	7
N	yunga	A49	1500Hz	47	4.35	0.01175	7
N	yunga	A49	1750Hz	55	4.35	0.01175	7
N	yunga	A49	2000Hz	60	4.35	0.01175	7
N	yunga	A49	200Hz	45	4.35	0.01175	7
N	yunga	A49	2250Hz	75	4.35	0.01175	7
N	yunga	A49	2500Hz	80	4.35	0.01175	7
N	yunga	A49	3000Hz	79	4.35	0.01175	7
N	yunga	A49	300Hz	45	4.35	0.01175	7
N	yunga	A49	4000Hz	100	4.35	0.01175	7
N	yunga	A49	400Hz	40	4.35	0.01175	7
N	yunga	A49	500Hz	40	4.35	0.01175	7
N	yunga	A49	700Hz	46	4.35	0.01175	7
N	yunga	A49	900Hz	45	4.35	0.01175	7
N	yunga	A50	1100Hz	46	4.48	0.00875	7
N	yunga	A50	1300Hz	50	4.48	0.00875	7
N	yunga	A50	1500Hz	41	4.48	0.00875	7
N	yunga	A50	1750Hz	55	4.48	0.00875	7
N	yunga	A50	2000Hz	65	4.48	0.00875	7
N	yunga	A50	200Hz	55	4.48	0.00875	7
N	yunga	A50	2250Hz	80	4.48	0.00875	7
N	yunga	A50	2500Hz	85	4.48	0.00875	7
N	yunga	A50	3000Hz	84	4.48	0.00875	7
N	yunga	A50	300Hz	50	4.48	0.00875	7
N	yunga	A50	400Hz	40	4.48	0.00875	7
N	yunga	A50	500Hz	47	4.48	0.00875	7
N	yunga	A50	700Hz	40	4.48	0.00875	7
N	yunga	A50	900Hz	40	4.48	0.00875	7
N	yunga	A52	1100Hz	65	4.61	0.007	7
N	yunga	A52	1300Hz	65	4.61	0.007	7
N	yunga	A52	1500Hz	62	4.61	0.007	7
N	yunga	A52	1750Hz	70	4.61	0.007	7
N	yunga	A52	2000Hz	81	4.61	0.007	7
N	yunga	A52	200Hz	50	4.61	0.007	7
N	yunga	A52	2250Hz	85	4.61	0.007	7
N	yunga	A52	2500Hz	98	4.61	0.007	7
N	yunga	A52	3000Hz	100	4.61	0.007	7
N	yunga	A52	300Hz	55	4.61	0.007	7
N	yunga	A52	3500Hz	103	4.61	0.007	7
N	yunga	A52	4000Hz	105	4.61	0.007	7
N	yunga	A52	400Hz	45	4.61	0.007	7
N	yunga	A52	500Hz	55	4.61	0.007	7
N	yunga	A52	700Hz	61	4.61	0.007	7
N	yunga	A52	900Hz	50	4.61	0.007	7
N	yunga	A55	1100Hz	50	5.55	0.0055	7
N	yunga	A55	1300Hz	60	5.55	0.0055	7
N	yunga	A55	1500Hz	47	5.55	0.0055	7
N	yunga	A55	1750Hz	55	5.55	0.0055	7
N	yunga	A55	2000Hz	65	5.55	0.0055	7
N	yunga	A55	200Hz	55	5.55	0.0055	7
N	yunga	A55	2250Hz	76	5.55	0.0055	7
N	yunga	A55	2500Hz	80	5.55	0.0055	7
N	yunga	A55	3000Hz	90	5.55	0.0055	7
N	yunga	A55	300Hz	65	5.55	0.0055	7
N	yunga	A55	400Hz	70	5.55	0.0055	7
N	yunga	A55	500Hz	70	5.55	0.0055	7
N	yunga	A55	700Hz	55	5.55	0.0055	7
N	yunga	A55	900Hz	50	5.55	0.0055	7
N	yunga	A56	200Hz	50	6.6	0.0155	7
N	yunga	A56	300Hz	50	6.6	0.0155	7
N	yunga	A56	900Hz	45	6.6	0.0155	7
N	yunga	A59	1100Hz	45	4.82	0.00925	7
N	yunga	A59	1300Hz	50	4.82	0.00925	7
N	yunga	A59	1500Hz	47	4.82	0.00925	7
N	yunga	A59	1750Hz	60	4.82	0.00925	7
N	yunga	A59	2000Hz	65	4.82	0.00925	7
N	yunga	A59	200Hz	55	4.82	0.00925	7
N	yunga	A59	2250Hz	75	4.82	0.00925	7
N	yunga	A59	2500Hz	75	4.82	0.00925	7
N	yunga	A59	3000Hz	85	4.82	0.00925	7
N	yunga	A59	300Hz	60	4.82	0.00925	7
N	yunga	A59	400Hz	60	4.82	0.00925	7
N	yunga	A59	500Hz	60	4.82	0.00925	7
N	yunga	A59	700Hz	49	4.82	0.00925	7
N	yunga	A59	900Hz	50	4.82	0.00925	7
N	yunga	A60	200Hz	40	5.05	0.0305	7
N	yunga	A60	300Hz	39	5.05	0.0305	7
N	yunga	A61	1100Hz	45	6.39	0.0085	7
N	yunga	A61	1300Hz	40	6.39	0.0085	7
N	yunga	A61	1500Hz	43	6.39	0.0085	7
N	yunga	A61	1750Hz	50	6.39	0.0085	7
N	yunga	A61	2000Hz	60	6.39	0.0085	7
N	yunga	A61	200Hz	60	6.39	0.0085	7
N	yunga	A61	2250Hz	70	6.39	0.0085	7
N	yunga	A61	2500Hz	75	6.39	0.0085	7
N	yunga	A61	3000Hz	80	6.39	0.0085	7
N	yunga	A61	300Hz	53	6.39	0.0085	7
N	yunga	A61	3500Hz	95	6.39	0.0085	7
N	yunga	A61	4000Hz	100	6.39	0.0085	7
N	yunga	A61	400Hz	55	6.39	0.0085	7
N	yunga	A61	500Hz	45	6.39	0.0085	7
N	yunga	A61	700Hz	41	6.39	0.0085	7
N	yunga	A61	900Hz	40	6.39	0.0085	7
N	yunga	A62	1100Hz	35	5.61	0.0215	7
N	yunga	A62	1300Hz	40	5.61	0.0215	7
N	yunga	A62	1500Hz	49	5.61	0.0215	7
N	yunga	A62	1750Hz	55	5.61	0.0215	7
N	yunga	A62	2000Hz	65	5.61	0.0215	7
N	yunga	A62	200Hz	50	5.61	0.0215	7
N	yunga	A62	2250Hz	75	5.61	0.0215	7
N	yunga	A62	2500Hz	80	5.61	0.0215	7
N	yunga	A62	3000Hz	90	5.61	0.0215	7
N	yunga	A62	300Hz	50	5.61	0.0215	7
N	yunga	A62	3500Hz	102	5.61	0.0215	7
N	yunga	A62	4000Hz	105	5.61	0.0215	7
N	yunga	A62	400Hz	50	5.61	0.0215	7
N	yunga	A62	500Hz	50	5.61	0.0215	7
N	yunga	A62	700Hz	40	5.61	0.0215	7
N	yunga	A62	900Hz	35	5.61	0.0215	7
N	yunga	A64	1100Hz	40	5.5	0.0115	7
N	yunga	A64	1300Hz	45	5.5	0.0115	7
N	yunga	A64	1500Hz	57	5.5	0.0115	7
N	yunga	A64	1750Hz	65	5.5	0.0115	7
N	yunga	A64	2000Hz	75	5.5	0.0115	7
N	yunga	A64	200Hz	40	5.5	0.0115	7
N	yunga	A64	2250Hz	75	5.5	0.0115	7
N	yunga	A64	2500Hz	80	5.5	0.0115	7
N	yunga	A64	3000Hz	100	5.5	0.0115	7
N	yunga	A64	300Hz	55	5.5	0.0115	7
N	yunga	A64	400Hz	55	5.5	0.0115	7
N	yunga	A64	500Hz	35	5.5	0.0115	7
N	yunga	A64	700Hz	35	5.5	0.0115	7
N	yunga	A64	900Hz	40	5.5	0.0115	7
N	yunga	A65	1100Hz	50	4.65	0.00675	7
N	yunga	A65	1300Hz	60	4.65	0.00675	7
N	yunga	A65	1500Hz	54	4.65	0.00675	7
N	yunga	A65	1750Hz	70	4.65	0.00675	7
N	yunga	A65	2000Hz	75	4.65	0.00675	7
N	yunga	A65	200Hz	45	4.65	0.00675	7
N	yunga	A65	2250Hz	91	4.65	0.00675	7
N	yunga	A65	2500Hz	90	4.65	0.00675	7
N	yunga	A65	3000Hz	105	4.65	0.00675	7
N	yunga	A65	300Hz	55	4.65	0.00675	7
N	yunga	A65	3500Hz	95	4.65	0.00675	7
N	yunga	A65	4000Hz	105	4.65	0.00675	7
N	yunga	A65	400Hz	55	4.65	0.00675	7
N	yunga	A65	500Hz	60	4.65	0.00675	7
N	yunga	A65	700Hz	55	4.65	0.00675	7
N	yunga	A65	900Hz	55	4.65	0.00675	7
N	yunga	A94	1100Hz	50	3.57	0.00525	7
N	yunga	A94	1300Hz	50	3.57	0.00525	7
N	yunga	A94	1500Hz	47	3.57	0.00525	7
N	yunga	A94	1750Hz	55	3.57	0.00525	7
N	yunga	A94	2000Hz	65	3.57	0.00525	7
N	yunga	A94	200Hz	50	3.57	0.00525	7
N	yunga	A94	2250Hz	81	3.57	0.00525	7
N	yunga	A94	2500Hz	75	3.57	0.00525	7
N	yunga	A94	3000Hz	78	3.57	0.00525	7
N	yunga	A94	300Hz	60	3.57	0.00525	7
N	yunga	A94	4000Hz	105	3.57	0.00525	7
N	yunga	A94	400Hz	55	3.57	0.00525	7
N	yunga	A94	500Hz	52	3.57	0.00525	7
N	yunga	A94	700Hz	50	3.57	0.00525	7
N	yunga	A94	900Hz	55	3.57	0.00525	7
N	yunga	A95	1100Hz	60	3.29	0.00525	7
N	yunga	A95	1300Hz	75	3.29	0.00525	7
N	yunga	A95	1500Hz	62	3.29	0.00525	7
N	yunga	A95	1750Hz	75	3.29	0.00525	7
N	yunga	A95	2000Hz	73	3.29	0.00525	7
N	yunga	A95	200Hz	60	3.29	0.00525	7
N	yunga	A95	2250Hz	81	3.29	0.00525	7
N	yunga	A95	2500Hz	90	3.29	0.00525	7
N	yunga	A95	3000Hz	79	3.29	0.00525	7
N	yunga	A95	300Hz	45	3.29	0.00525	7
N	yunga	A95	4000Hz	100	3.29	0.00525	7
N	yunga	A95	400Hz	65	3.29	0.00525	7
N	yunga	A95	500Hz	66	3.29	0.00525	7
N	yunga	A95	700Hz	55	3.29	0.00525	7
N	yunga	A95	900Hz	70	3.29	0.00525	7
N	yunga	A96	1100Hz	65	2.91	0.0085	7
N	yunga	A96	1300Hz	60	2.91	0.0085	7
N	yunga	A96	1500Hz	61	2.91	0.0085	7
N	yunga	A96	1750Hz	65	2.91	0.0085	7
N	yunga	A96	2000Hz	70	2.91	0.0085	7
N	yunga	A96	200Hz	75	2.91	0.0085	7
N	yunga	A96	2250Hz	80	2.91	0.0085	7
N	yunga	A96	2500Hz	65	2.91	0.0085	7
N	yunga	A96	3000Hz	73	2.91	0.0085	7
N	yunga	A96	300Hz	55	2.91	0.0085	7
N	yunga	A96	3500Hz	94	2.91	0.0085	7
N	yunga	A96	4000Hz	85	2.91	0.0085	7
N	yunga	A96	400Hz	70	2.91	0.0085	7
N	yunga	A96	500Hz	60	2.91	0.0085	7
N	yunga	A96	700Hz	60	2.91	0.0085	7
N	yunga	A96	900Hz	65	2.91	0.0085	7
N	yunga	A97	1100Hz	65	2.55	0.012	7
N	yunga	A97	1300Hz	75	2.55	0.012	7
N	yunga	A97	1500Hz	65	2.55	0.012	7
N	yunga	A97	1750Hz	70	2.55	0.012	7
N	yunga	A97	2000Hz	70	2.55	0.012	7
N	yunga	A97	200Hz	35	2.55	0.012	7
N	yunga	A97	2250Hz	82	2.55	0.012	7
N	yunga	A97	2500Hz	65	2.55	0.012	7
N	yunga	A97	3000Hz	69	2.55	0.012	7
N	yunga	A97	300Hz	30	2.55	0.012	7
N	yunga	A97	400Hz	40	2.55	0.012	7
N	yunga	A97	500Hz	30	2.55	0.012	7
N	yunga	A97	700Hz	35	2.55	0.012	7
N	yunga	A97	900Hz	50	2.55	0.012	7
N	yunga	A98	1100Hz	80	2.48	0.00275	7
N	yunga	A98	1500Hz	73	2.48	0.00275	7
N	yunga	A98	1750Hz	80	2.48	0.00275	7
N	yunga	A98	200Hz	65	2.48	0.00275	7
N	yunga	A98	2250Hz	88	2.48	0.00275	7
N	yunga	A98	2500Hz	90	2.48	0.00275	7
N	yunga	A98	3000Hz	87	2.48	0.00275	7
N	yunga	A98	300Hz	55	2.48	0.00275	7
N	yunga	A98	4000Hz	100	2.48	0.00275	7
N	yunga	A98	400Hz	60	2.48	0.00275	7
N	yunga	A98	500Hz	65	2.48	0.00275	7
N	yunga	A98	700Hz	65	2.48	0.00275	7
N	yunga	A98	900Hz	80	2.48	0.00275	7
N	yunga	A99	1100Hz	65	3.48	0.00675	7
N	yunga	A99	1300Hz	65	3.48	0.00675	7
N	yunga	A99	1500Hz	60	3.48	0.00675	7
N	yunga	A99	1750Hz	70	3.48	0.00675	7
N	yunga	A99	2000Hz	75	3.48	0.00675	7
N	yunga	A99	200Hz	40	3.48	0.00675	7
N	yunga	A99	2250Hz	73	3.48	0.00675	7
N	yunga	A99	2500Hz	75	3.48	0.00675	7
N	yunga	A99	3000Hz	84	3.48	0.00675	7
N	yunga	A99	300Hz	44	3.48	0.00675	7
N	yunga	A99	4000Hz	100	3.48	0.00675	7
N	yunga	A99	400Hz	55	3.48	0.00675	7
N	yunga	A99	500Hz	60	3.48	0.00675	7
N	yunga	A99	700Hz	65	3.48	0.00675	7
N	yunga	A99	900Hz	60	3.48	0.00675	7

## Sheet: Vibration
Ears (Y/N)	species	individual	Frequncy	weight (g)	rawdB	click amplitude
N	arborescandens	A10	200Hz	1.54	57.1251	0.01375
N	arborescandens	A10	300Hz	1.54	54.6356	0.01375
N	arborescandens	A10	400Hz	1.54	56.6626	0.01375
N	arborescandens	A10	500Hz	1.54	64.0834	0.01375
N	arborescandens	A10	700Hz	1.54	79.2426	0.01375
N	arborescandens	A10	900Hz	1.54	92.4527	0.01375
N	arborescandens	A11	200Hz	1.76	62.0849	0.009
N	arborescandens	A11	300Hz	1.76	64.597	0.009
N	arborescandens	A11	400Hz	1.76	71.6056	0.009
N	arborescandens	A11	500Hz	1.76	64.0755	0.009
N	arborescandens	A11	700Hz	1.76	89.287	0.009
N	arborescandens	A11	900Hz	1.76	107.48	0.009
N	arborescandens	A12	200Hz	3.84	51.7049	0.00725
N	arborescandens	A12	300Hz	3.84	49.2325	0.00725
N	arborescandens	A12	400Hz	3.84	61.066	0.00725
N	arborescandens	A12	500Hz	3.84	64.0015	0.00725
N	arborescandens	A12	700Hz	3.84	89.7064	0.00725
N	arborescandens	A12	900Hz	3.84	97.7344	0.00725
N	arborescandens	A13	200Hz	3.86	51.7012	0.00525
N	arborescandens	A13	300Hz	3.86	54.229	0.00525
N	arborescandens	A13	400Hz	3.86	56.0609	0.00525
N	arborescandens	A13	500Hz	3.86	64.0008	0.00525
N	arborescandens	A13	700Hz	3.86	84.7105	0.00525
N	arborescandens	A13	900Hz	3.86	92.7368	0.00525
N	arborescandens	A14	200Hz	4.3	51.6208	0.0195
N	arborescandens	A14	300Hz	4.3	49.1519	0.0195
N	arborescandens	A14	400Hz	4.3	50.9467	0.0195
N	arborescandens	A14	500Hz	4.3	53.9851	0.0195
N	arborescandens	A14	700Hz	4.3	64.7992	0.0195
N	arborescandens	A14	900Hz	4.3	87.7907	0.0195
N	arborescandens	A15	200Hz	4.42	36.5989	0.0145
N	arborescandens	A15	300Hz	4.42	49.1308	0.0145
N	arborescandens	A15	400Hz	4.42	60.9156	0.0145
N	arborescandens	A15	500Hz	4.42	68.9808	0.0145
N	arborescandens	A15	700Hz	4.42	79.8234	0.0145
N	arborescandens	A15	900Hz	4.42	87.8054	0.0145
N	arborescandens	A4	200Hz	2.3	56.9862	0.012
N	arborescandens	A4	300Hz	2.3	54.5024	0.012
N	arborescandens	A4	400Hz	2.3	61.4655	0.012
N	arborescandens	A4	500Hz	2.3	69.0563	0.012
N	arborescandens	A4	700Hz	2.3	84.3959	0.012
N	arborescandens	A4	900Hz	2.3	97.5457	0.012
N	arborescandens	A8	200Hz	3	56.8583	0.01175
N	arborescandens	A8	300Hz	3	54.3797	0.01175
N	arborescandens	A8	400Hz	3	61.2839	0.01175
N	arborescandens	A8	500Hz	3	69.0314	0.01175
N	arborescandens	A8	700Hz	3	84.537	0.01175
N	arborescandens	A8	900Hz	3	102.631	0.01175
N	arborescandens	A9	200Hz	2.38	36.9716	0.025
N	arborescandens	A9	300Hz	2.38	44.4883	0.025
N	arborescandens	A9	400Hz	2.38	51.4447	0.025
N	arborescandens	A9	500Hz	2.38	54.0535	0.025
N	arborescandens	A9	700Hz	2.38	79.412	0.025
N	arborescandens	A9	900Hz	2.38	87.5555	0.025
N	festae	A3166	200Hz	4.84	56.5221	0.018
N	festae	A3166	300Hz	4.84	59.0572	0.018
N	festae	A3166	400Hz	4.84	60.8067	0.018
N	festae	A3166	500Hz	4.84	68.9659	0.018
N	festae	A3166	700Hz	4.84	79.9081	0.018
N	festae	A3166	900Hz	4.84	87.8569	0.018
N	festae	A3695	200Hz	1.78	57.0812	0.00875
N	festae	A3695	300Hz	1.78	54.5935	0.00875
N	festae	A3695	400Hz	1.78	56.6004	0.00875
N	festae	A3695	500Hz	1.78	69.0748	0.00875
N	festae	A3695	700Hz	1.78	79.291	0.00875
N	festae	A3695	900Hz	1.9	97.4821	0.00875
N	festae	A3701	200Hz	1.9	62.0593	0.01
N	festae	A3701	300Hz	1.9	59.5725	0.01
N	festae	A3701	400Hz	1.9	61.5692	0.01
N	festae	A3701	500Hz	1.9	69.0706	0.01
N	festae	A3701	700Hz	1.9	74.3152	0.01
N	festae	A3701	900Hz	1.9	87.4968	0.01
N	festae	A3702	200Hz	2.16	57.0118	0.0125
N	festae	A3702	300Hz	2.16	59.5269	0.0125
N	festae	A3702	400Hz	2.16	61.5018	0.0125
N	festae	A3702	500Hz	2.16	69.0613	0.0125
N	festae	A3702	700Hz	2.16	79.3677	0.0125
N	festae	A3702	900Hz	2.16	97.5286	0.0125
N	guacamayo	A2515	200Hz	0.9	50	0.02
N	guacamayo	A2515	300Hz	0.9	50	0.02
N	guacamayo	A2515	400Hz	0.9	50	0.02
N	guacamayo	A2515	500Hz	0.9	55	0.02
N	guacamayo	A2515	700Hz	0.9	70	0.02
N	guacamayo	A2515	900Hz	0.9	85	0.02
N	guacamayo	A2516	200Hz	1.3	70	0.00425
N	guacamayo	A2516	300Hz	1.3	55	0.00425
N	guacamayo	A2516	400Hz	1.3	65	0.00425
N	guacamayo	A2516	500Hz	1.3	65	0.00425
N	guacamayo	A2516	700Hz	1.3	75	0.00425
N	guacamayo	A2516	900Hz	1.3	95	0.00425
N	guacamayo	A2517	200Hz	1.4	55	0.01175
N	guacamayo	A2517	300Hz	1.4	45	0.01175
N	guacamayo	A2517	400Hz	1.4	50	0.01175
N	guacamayo	A2517	500Hz	1.4	50	0.01175
N	guacamayo	A2517	700Hz	1.4	65	0.01175
N	guacamayo	A2517	900Hz	1.4	85	0.01175
N	guacamayo	A2518	200Hz	1.8	60	0.0135
N	guacamayo	A2518	300Hz	1.8	60	0.0135
N	guacamayo	A2518	400Hz	1.8	55	0.0135
N	guacamayo	A2518	500Hz	1.8	55	0.0135
N	guacamayo	A2518	700Hz	1.8	70	0.0135
N	guacamayo	A2518	900Hz	1.8	85	0.0135
N	guacamayo	A2519	200Hz	1.5	50	0.0305
N	guacamayo	A2519	300Hz	1.5	45	0.0305
N	guacamayo	A2519	400Hz	1.5	50	0.0305
N	guacamayo	A2519	500Hz	1.5	60	0.0305
N	guacamayo	A2519	700Hz	1.5	75	0.0305
N	guacamayo	A2519	900Hz	1.5	85	0.0305
N	guacamayo	A2520	200Hz	1.9	55	0.02025
N	guacamayo	A2520	300Hz	1.9	55	0.02025
N	guacamayo	A2520	400Hz	1.9	50	0.02025
N	guacamayo	A2520	500Hz	1.9	50	0.02025
N	guacamayo	A2520	700Hz	1.9	65	0.02025
N	guacamayo	A2520	900Hz	1.9	85	0.02025
N	guacamayo	A2521	200Hz	3.3	60	0.01675
N	guacamayo	A2521	300Hz	3.3	60	0.01675
N	guacamayo	A2521	400Hz	3.3	55	0.01675
N	guacamayo	A2521	500Hz	3.3	60	0.01675
N	guacamayo	A2521	700Hz	3.3	75	0.01675
N	guacamayo	A2521	900Hz	3.3	85	0.01675
N	guacamayo	A2522	200Hz	3	70	0.0045
N	guacamayo	A2522	300Hz	3	70	0.0045
N	guacamayo	A2522	400Hz	3	70	0.0045
N	guacamayo	A2522	500Hz	3	80	0.0045
N	guacamayo	A2522	700Hz	3	80	0.0045
N	guacamayo	A2522	900Hz	3	95	0.0045
N	guacamayo	A2523	200Hz	3.2	55	0.01375
N	guacamayo	A2523	300Hz	3.2	50	0.01375
N	guacamayo	A2523	400Hz	3.2	55	0.01375
N	guacamayo	A2523	500Hz	3.2	60	0.01375
N	guacamayo	A2523	700Hz	3.2	70	0.01375
N	guacamayo	A2523	900Hz	3.2	85	0.01375
Y	haematiticus	A1710	200Hz	2.1	75	0.01125
Y	haematiticus	A1710	300Hz	2.1	70	0.01125
Y	haematiticus	A1710	400Hz	2.1	65	0.01125
Y	haematiticus	A1710	500Hz	2.1	70	0.01125
Y	haematiticus	A1710	700Hz	2.1	80	0.01125
Y	haematiticus	A1710	900Hz	2.1	90	0.01125
Y	haematiticus	A1711	200Hz	2.4	75	0.00525
Y	haematiticus	A1711	300Hz	2.4	70	0.00525
Y	haematiticus	A1711	400Hz	2.4	65	0.00525
Y	haematiticus	A1711	500Hz	2.4	65	0.00525
Y	haematiticus	A1711	700Hz	2.4	75	0.00525
Y	haematiticus	A1711	900Hz	2.4	95	0.00525
Y	haematiticus	A1712	200Hz	2.4	60	0.0115
Y	haematiticus	A1712	300Hz	2.4	65	0.0115
Y	haematiticus	A1712	400Hz	2.4	65	0.0115
Y	haematiticus	A1712	500Hz	2.4	70	0.0115
Y	haematiticus	A1712	700Hz	2.4	75	0.0115
Y	haematiticus	A1712	900Hz	2.4	80	0.0115
Y	haematiticus	A1713	200Hz	2.7	60	0.036
Y	haematiticus	A1713	300Hz	2.7	60	0.036
Y	haematiticus	A1713	400Hz	2.7	50	0.036
Y	haematiticus	A1713	500Hz	2.7	50	0.036
Y	haematiticus	A1713	700Hz	2.7	55	0.036
Y	haematiticus	A1713	900Hz	2.7	70	0.036
Y	haematiticus	A1714	200Hz	2.3	75	0.012
Y	haematiticus	A1714	300Hz	2.3	65	0.012
Y	haematiticus	A1714	400Hz	2.3	65	0.012
Y	haematiticus	A1714	500Hz	2.3	65	0.012
Y	haematiticus	A1714	700Hz	2.3	70	0.012
Y	haematiticus	A1714	900Hz	2.3	85	0.012
Y	haematiticus	A1715	200Hz	2.9	75	0.009
Y	haematiticus	A1715	300Hz	2.9	80	0.009
Y	haematiticus	A1715	400Hz	2.9	75	0.009
Y	haematiticus	A1715	500Hz	2.9	70	0.009
Y	haematiticus	A1715	700Hz	2.9	85	0.009
Y	haematiticus	A1715	900Hz	2.9	90	0.009
Y	haematiticus	A1716	200Hz	2	65	0.024
Y	haematiticus	A1716	300Hz	2	65	0.024
Y	haematiticus	A1716	400Hz	2	60	0.024
Y	haematiticus	A1716	500Hz	2	65	0.024
Y	haematiticus	A1716	700Hz	2	75	0.024
Y	haematiticus	A1716	900Hz	2	75	0.024
Y	haematiticus	A1717	200Hz	2.4	70	0.0735
Y	haematiticus	A1717	300Hz	2.4	60	0.0735
Y	haematiticus	A1717	400Hz	2.4	55	0.0735
Y	haematiticus	A1717	500Hz	2.4	55	0.0735
Y	haematiticus	A1717	700Hz	2.4	65	0.0735
Y	haematiticus	A1717	900Hz	2.4	70	0.0735
Y	haematiticus	A1739	200Hz	3.6	70	0.03025
Y	haematiticus	A1739	300Hz	3.6	60	0.03025
Y	haematiticus	A1739	400Hz	3.6	55	0.03025
Y	haematiticus	A1739	500Hz	3.6	55	0.03025
Y	haematiticus	A1739	700Hz	3.6	65	0.03025
Y	haematiticus	A1739	900Hz	3.6	70	0.03025
Y	leptoscelis	A100	200Hz	3.26	46.8108	0.041
Y	leptoscelis	A100	300Hz	3.26	44.3341	0.041
Y	leptoscelis	A100	400Hz	3.26	41.2165	0.041
Y	leptoscelis	A100	500Hz	3.26	54.0221	0.041
Y	leptoscelis	A100	700Hz	3.26	59.5895	0.041
Y	leptoscelis	A100	900Hz	3.26	72.6633	0.041
Y	leptoscelis	A17	200Hz	1.54	67.1251	0.00625
Y	leptoscelis	A17	300Hz	1.54	69.6356	0.00625
Y	leptoscelis	A17	400Hz	1.54	66.6626	0.00625
Y	leptoscelis	A17	500Hz	1.54	74.0834	0.00625
Y	leptoscelis	A17	700Hz	1.54	89.2426	0.00625
Y	leptoscelis	A17	900Hz	1.54	107.453	0.00625
Y	leptoscelis	A18	200Hz	2.04	57.0337	0.01375
Y	leptoscelis	A18	300Hz	2.04	64.5479	0.01375
Y	leptoscelis	A19	200Hz	1.96	62.0484	0.0155
Y	leptoscelis	A19	300Hz	1.96	59.562	0.0155
Y	leptoscelis	A19	400Hz	1.96	66.5537	0.0155
Y	leptoscelis	A19	500Hz	1.96	69.0684	0.0155
Y	leptoscelis	A19	700Hz	1.96	79.3273	0.0155
Y	leptoscelis	A19	900Hz	1.96	77.5041	0.0155
Y	leptoscelis	A20	200Hz	2.2	62.0045	0.013
Y	leptoscelis	A20	300Hz	2.2	59.5199	0.013
Y	leptoscelis	A21	200Hz	2.32	61.9826	0.0245
Y	leptoscelis	A21	300Hz	2.32	64.4989	0.0245
Y	leptoscelis	A21	400Hz	2.32	66.4603	0.0245
Y	leptoscelis	A21	500Hz	2.32	79.0556	0.0245
Y	leptoscelis	A21	700Hz	2.32	79.3999	0.0245
Y	leptoscelis	A21	900Hz	2.32	87.5482	0.0245
Y	leptoscelis	A22	200Hz	2.54	61.9424	0.00925
Y	leptoscelis	A22	300Hz	2.54	69.4603	0.00925
Y	leptoscelis	A23	200Hz	6.96	46.1348	0.04125
Y	leptoscelis	A23	300Hz	6.96	43.6857	0.04125
Y	leptoscelis	A23	400Hz	6.96	50.2568	0.04125
Y	leptoscelis	A23	500Hz	6.96	58.8904	0.04125
Y	leptoscelis	A23	700Hz	6.96	75.3356	0.04125
Y	leptoscelis	A23	900Hz	6.96	88.1166	0.04125
Y	leptoscelis	A24	200Hz	5.64	41.376	0.041
Y	leptoscelis	A24	300Hz	5.64	38.917	0.041
Y	leptoscelis	A24	400Hz	5.64	45.5992	0.041
Y	leptoscelis	A24	500Hz	5.64	53.9374	0.041
Y	leptoscelis	A24	700Hz	5.64	70.0694	0.041
Y	leptoscelis	A24	900Hz	5.64	82.9549	0.041
Y	leptoscelis	A25	200Hz	2.08	62.0264	0.02525
Y	leptoscelis	A25	300Hz	2.08	59.5409	0.02525
Y	leptoscelis	A25	400Hz	2.08	61.5225	0.02525
Y	leptoscelis	A25	500Hz	2.08	64.0642	0.02525
Y	leptoscelis	A25	700Hz	2.08	64.3515	0.02525
Y	leptoscelis	A25	900Hz	2.08	72.5188	0.02525
Y	margaritifer	A1731	200Hz	3.4	80	0.02575
Y	margaritifer	A1731	300Hz	3.4	70	0.02575
Y	margaritifer	A1731	400Hz	3.4	70	0.02575
Y	margaritifer	A1731	500Hz	3.4	70	0.02575
Y	margaritifer	A1731	700Hz	3.4	75	0.02575
Y	margaritifer	A1731	900Hz	3.4	80	0.02575
Y	margaritifer	A1732	200Hz	3.3	75	0.0215
Y	margaritifer	A1732	300Hz	3.3	65	0.0215
Y	margaritifer	A1732	400Hz	3.3	55	0.0215
Y	margaritifer	A1732	500Hz	3.3	55	0.0215
Y	margaritifer	A1732	700Hz	3.3	65	0.0215
Y	margaritifer	A1732	900Hz	3.3	75	0.0215
Y	margaritifer	A1734	200Hz	3	75	0.0085
Y	margaritifer	A1734	300Hz	3	68	0.0085
Y	margaritifer	A1735	200Hz	3.1	65	0.0415
Y	margaritifer	A1735	300Hz	3.1	65	0.0415
Y	margaritifer	A1735	400Hz	3.1	65	0.0415
Y	margaritifer	A1735	500Hz	3.1	75	0.0415
Y	margaritifer	A1735	700Hz	3.1	85	0.0415
Y	margaritifer	A1735	900Hz	3.1	85	0.0415
Y	margaritifer	A1736	200Hz	4.1	65	0.036
Y	margaritifer	A1736	300Hz	4.1	60	0.036
Y	margaritifer	A1736	400Hz	4.1	60	0.036
Y	margaritifer	A1736	500Hz	4.1	60	0.036
Y	margaritifer	A1736	700Hz	4.1	70	0.036
Y	margaritifer	A1736	900Hz	4.1	80	0.036
Y	marinus	A1740	200Hz	4.2	65	0.00825
Y	marinus	A1740	300Hz	4.2	55	0.00825
Y	marinus	A1740	400Hz	4.2	60	0.00825
Y	marinus	A1740	500Hz	4.2	65	0.00825
Y	marinus	A1740	700Hz	4.2	70	0.00825
Y	marinus	A1740	900Hz	4.2	85	0.00825
Y	marinus	A1741	200Hz	3.5	80	0.03475
Y	marinus	A1741	300Hz	3.5	70	0.03475
Y	marinus	A1741	400Hz	3.5	60	0.03475
Y	marinus	A1741	500Hz	3.5	70	0.03475
Y	marinus	A1741	700Hz	3.5	70	0.03475
Y	marinus	A1741	900Hz	3.5	75	0.03475
Y	marinus	A1742	200Hz	3	55	0.01325
Y	marinus	A1742	300Hz	3	56	0.01325
Y	marinus	A1742	400Hz	3	60	0.01325
Y	marinus	A1742	500Hz	3	67	0.01325
Y	marinus	A1742	700Hz	3	70	0.01325
Y	marinus	A1742	900Hz	3	82	0.01325
Y	marinus	A1743	200Hz	4.4	65	0.014
Y	marinus	A1743	300Hz	4.4	65	0.014
Y	marinus	A1743	400Hz	4.4	60	0.014
Y	marinus	A1743	500Hz	4.4	65	0.014
Y	marinus	A1743	700Hz	4.4	75	0.014
Y	marinus	A1743	900Hz	4.4	75	0.014
Y	marinus	A1745	200Hz	3.6	56	0.0175
Y	marinus	A1745	300Hz	3.6	62	0.0175
Y	spinulosus	A31	200Hz	2.14	52.0155	0.0085
Y	spinulosus	A31	300Hz	2.14	49.5304	0.0085
Y	spinulosus	A31	400Hz	2.14	61.507	0.0085
Y	spinulosus	A31	500Hz	2.14	69.062	0.0085
Y	spinulosus	A31	700Hz	2.14	79.3636	0.0085
Y	spinulosus	A31	900Hz	2.14	97.5261	0.0085
Y	spinulosus	A32	200Hz	2.38	51.9716	0.0135
Y	spinulosus	A32	300Hz	2.38	49.4883	0.0135
Y	spinulosus	A32	400Hz	2.38	61.4447	0.0135
Y	spinulosus	A32	500Hz	2.38	64.0535	0.0135
Y	spinulosus	A32	700Hz	2.38	79.412	0.0135
Y	spinulosus	A32	900Hz	2.38	92.5555	0.0135
Y	spinulosus	A33	200Hz	2.52	46.946	0.00575
Y	spinulosus	A33	300Hz	2.52	44.4638	0.00575
Y	spinulosus	A33	400Hz	2.52	51.4084	0.00575
Y	spinulosus	A33	500Hz	2.52	64.0485	0.00575
Y	spinulosus	A33	700Hz	2.52	74.4403	0.00575
Y	spinulosus	A33	900Hz	2.52	87.5727	0.00575
Y	spinulosus	A34	200Hz	2.5	61.9497	0.00575
Y	spinulosus	A34	300Hz	2.5	64.4673	0.00575
Y	spinulosus	A34	400Hz	2.5	61.4136	0.00575
Y	spinulosus	A34	500Hz	2.5	69.0492	0.00575
Y	spinulosus	A34	700Hz	2.5	94.4362	0.00575
Y	spinulosus	A34	900Hz	2.5	92.5702	0.00575
Y	spinulosus	A35	200Hz	2.36	51.9753	0.0125
Y	spinulosus	A35	300Hz	2.36	54.4918	0.0125
Y	spinulosus	A35	400Hz	2.36	56.4499	0.0125
Y	spinulosus	A35	500Hz	2.36	64.0542	0.0125
Y	spinulosus	A35	700Hz	2.36	79.408	0.0125
Y	spinulosus	A35	900Hz	2.36	92.5531	0.0125
Y	spinulosus	A36	200Hz	2.58	51.9351	0.006
Y	spinulosus	A36	300Hz	2.58	49.4533	0.006
Y	spinulosus	A36	400Hz	2.58	56.3929	0.006
Y	spinulosus	A36	500Hz	2.58	64.0464	0.006
Y	spinulosus	A36	700Hz	2.58	84.4524	0.006
Y	spinulosus	A36	900Hz	2.58	97.58	0.006
Y	tacana	A42	200Hz	2.32	56.9826	0.02725
Y	tacana	A42	300Hz	2.32	54.4989	0.02725
Y	tacana	A42	400Hz	2.32	61.4603	0.02725
Y	tacana	A42	500Hz	2.32	64.0556	0.02725
Y	tacana	A42	700Hz	2.32	79.3999	0.02725
Y	tacana	A42	900Hz	2.32	87.5482	0.02725
Y	tacana	A45	200Hz	1.64	57.1068	0.01525
Y	tacana	A45	300Hz	1.64	54.618	0.01525
Y	tacana	A45	400Hz	1.64	66.6367	0.01525
Y	tacana	A45	500Hz	1.64	74.0798	0.01525
Y	tacana	A45	700Hz	1.64	79.2628	0.01525
Y	tacana	A45	900Hz	1.64	92.4649	0.01525
Y	tacana	A46	200Hz	1.06	57.2128	0.039
Y	tacana	A46	300Hz	1.06	54.7197	0.039
Y	tacana	A46	400Hz	1.06	56.7871	0.039
Y	tacana	A46	500Hz	1.06	59.1005	0.039
Y	tacana	A46	700Hz	1.06	74.1458	0.039
Y	tacana	A46	900Hz	1.06	92.3939	0.039
Y	tacana	A47	200Hz	0.94	52.2347	0.01375
Y	tacana	A47	300Hz	0.94	54.7407	0.01375
Y	tacana	A47	400Hz	0.94	61.8182	0.01375
Y	tacana	A47	500Hz	0.94	69.1047	0.01375
Y	tacana	A47	700Hz	0.94	74.1216	0.01375
Y	tacana	A47	900Hz	0.94	82.3792	0.01375
Y	tacana	A73	200Hz	1.8	47.0776	0.055
Y	tacana	A73	300Hz	1.8	49.59	0.055
N	yunga	A28	200Hz	4.96	56.5002	0.00875
N	yunga	A28	300Hz	4.96	54.0362	0.00875
N	yunga	A28	400Hz	4.96	55.7755	0.00875
N	yunga	A28	500Hz	4.96	53.9616	0.00875
N	yunga	A28	700Hz	4.96	64.9323	0.00875
N	yunga	A28	900Hz	4.96	77.8716	0.00875
N	yunga	A49	200Hz	4.96	56.1531	0.009
N	yunga	A49	300Hz	6.86	63.7032	0.009
N	yunga	A49	400Hz	6.86	60.2827	0.009
N	yunga	A49	500Hz	6.86	68.894	0.009
N	yunga	A49	700Hz	6.86	70.3155	0.009
N	yunga	A49	900Hz	6.86	83.1043	0.009
N	yunga	A50	200Hz	9.46	70.678	0.0095
N	yunga	A50	300Hz	9.46	58.2476	0.0095
N	yunga	A50	400Hz	9.46	59.6083	0.0095
N	yunga	A50	500Hz	9.46	68.8014	0.0095
N	yunga	A50	700Hz	9.46	70.8398	0.0095
N	yunga	A50	900Hz	9.46	83.4228	0.0095
N	yunga	A52	200Hz	8.76	60.3272	0.0095
N	yunga	A52	300Hz	8.76	57.9111	0.0095
N	yunga	A52	400Hz	8.76	54.1103	0.0095
N	yunga	A52	500Hz	8.76	63.7331	0.0095
N	yunga	A52	700Hz	8.76	76.227	0.0095
N	yunga	A52	900Hz	8.76	88.658	0.0095
N	yunga	A59	200Hz	12.14	50.1884	0.015
N	yunga	A59	300Hz	12.14	52.7779	0.015
N	yunga	A59	400Hz	12.14	48.9132	0.015
N	yunga	A59	500Hz	12.14	58.706	0.015
N	yunga	A59	700Hz	12.14	61.3802	0.015
N	yunga	A59	900Hz	12.14	68.751	0.015
N	yunga	A60	200Hz	18.24	34.0738	0.0585
N	yunga	A60	300Hz	18.24	31.7089	0.0585
N	yunga	A60	400Hz	18.24	37.331	0.0585
N	yunga	A60	500Hz	18.24	53.4889	0.0585
N	yunga	A60	700Hz	18.24	67.6103	0.0585
N	yunga	A60	900Hz	18.24	74.4982	0.0585
N	yunga	A64	200Hz	17.5	49.209	0.02725
N	yunga	A64	300Hz	17.5	46.8386	0.02725
N	yunga	A64	400Hz	17.5	47.5229	0.02725
N	yunga	A64	500Hz	17.5	53.5152	0.02725
N	yunga	A64	700Hz	17.5	67.4611	0.02725
N	yunga	A64	900Hz	17.5	79.4076	0.02725
N	yunga	A65	200Hz	10.8	45.4332	0.01825
N	yunga	A65	300Hz	10.8	48.0127	0.01825
N	yunga	A65	400Hz	10.8	44.2608	0.01825
N	yunga	A65	500Hz	10.8	48.7537	0.01825
N	yunga	A65	700Hz	10.8	61.11	0.01825
N	yunga	A65	900Hz	10.8	73.5869	0.01825
N	yunga	A94	200Hz	4.22	51.6354	0.016
N	yunga	A94	300Hz	4.22	49.1659	0.016
N	yunga	A94	400Hz	4.22	50.9675	0.016
N	yunga	A94	500Hz	4.22	58.988	0.016
N	yunga	A94	700Hz	4.22	69.7831	0.016
N	yunga	A94	900Hz	4.22	72.7809	0.016
N	yunga	A95	200Hz	4.34	51.6135	0.015
N	yunga	A95	300Hz	4.34	54.1449	0.015
N	yunga	A95	400Hz	4.34	60.9364	0.015
N	yunga	A95	500Hz	4.34	68.9837	0.015
N	yunga	A95	700Hz	4.34	69.8073	0.015
N	yunga	A95	900Hz	4.34	77.7956	0.015
N	yunga	A96	200Hz	2.8	56.8949	0.0165
N	yunga	A96	300Hz	2.8	59.4147	0.0165
N	yunga	A96	400Hz	2.8	56.3358	0.0165
N	yunga	A96	500Hz	2.8	59.0385	0.0165
N	yunga	A96	700Hz	2.8	79.4967	0.0165
N	yunga	A96	900Hz	2.8	72.607	0.0165
N	yunga	A97	200Hz	1.76	57.0849	0.0255
N	yunga	A97	300Hz	1.76	49.597	0.0255
N	yunga	A97	400Hz	1.76	61.6056	0.0255
N	yunga	A97	500Hz	1.76	49.0755	0.0255
N	yunga	A97	700Hz	1.76	59.287	0.0255
N	yunga	A97	900Hz	1.76	57.4796	0.0255
N	yunga	A98	200Hz	1.64	67.1068	0.00675
N	yunga	A98	300Hz	1.64	64.618	0.00675
N	yunga	A98	400Hz	1.64	61.6367	0.00675
N	yunga	A98	500Hz	1.64	69.0798	0.00675
N	yunga	A98	700Hz	1.64	79.2628	0.00675
N	yunga	A98	900Hz	1.64	92.4649	0.00675
N	yunga	A99	200Hz	4.84	71.5221	0.0075
N	yunga	A99	300Hz	4.84	64.0572	0.0075
N	yunga	A99	400Hz	4.84	55.8067	0.0075
N	yunga	A99	500Hz	4.84	68.9659	0.0075
N	yunga	A99	700Hz	4.84	69.9081	0.0075
N	yunga	A99	900Hz	4.84	72.8569	0.0075
